# Supplementary material for: Derrone induces autophagic cell death through induction of ROS and ERK in A549 cells
Source: PubMed Central journal article supplement (PMC6583947; doi:10.1371/journal.pone.0218659), 2019-06-19
Supplement: pone.0218659.s001.pdf [file pone.0218659.s001.pdf]

**S1 Table.** <sup>1</sup>H NMR data of derrone (methanol-*d*<sub>4</sub>, 500 MHz).

| Carbon NO. | derrone                       |
|------------|-------------------------------|
|            | <sup>1</sup> H (M, 500MHz)    |
| 1          | -                             |
| 2          | 8.19 (1H, s)                  |
| 3          | -                             |
| 4          | -                             |
| 4a         | -                             |
| 5          | -                             |
| 6          | 6.23 (1H, s)                  |
| 7          | -                             |
| 8          | -                             |
| 8a         | -                             |
| 1'         | -                             |
| 2'         | 7.42 (1H, d, <i>J</i> = 8.5)  |
| 3'         | 6.87 (1H, d, <i>J</i> = 8.5)  |
| 4'         | -                             |
| 5'         | 6.87 (1H, d, <i>J</i> = 8.5)  |
| 6'         | 7.42 (1H, d, <i>J</i> = 8.5)  |
| 1''        | 6.76 (1H, d, <i>J</i> = 10.5) |
| 2''        | 5.73 (1H, d, <i>J</i> = 10.0) |
| 3''        | -                             |
| 4''        | 1.49 (3H, s)                  |
| 5''        | 1.49 (3H, s)                  |
