# Supplementary material for: Derrone induces autophagic cell death through induction of ROS and ERK in A549 cells
Source: PubMed Central journal article supplement (PMC6583947; doi:10.1371/journal.pone.0218659), 2019-06-19

**S4 Fig**

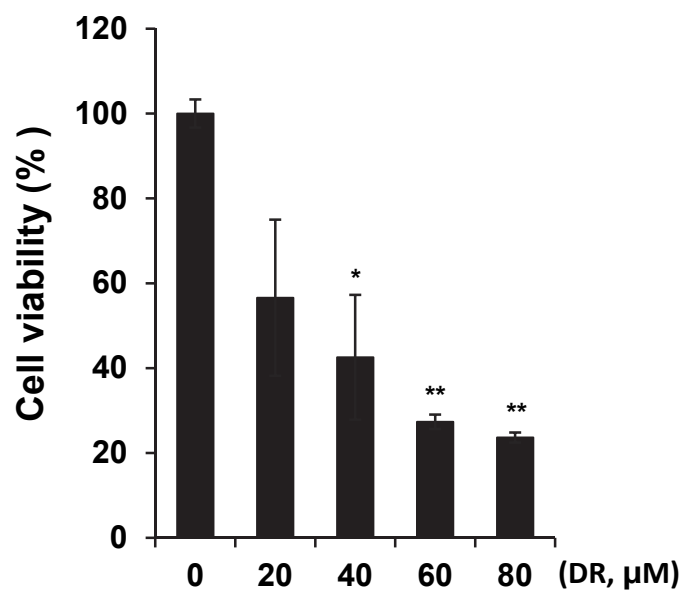

Supplement: pone.0218659.s005.pdf [file pone.0218659.s005.pdf]
